# Supplementary material
Source: PubMed Central journal article supplement (PMC6231545)
Supplement: NIHMS80247-supplement-Supplementary_Tables.pdf [file NIHMS80247-supplement-Supplementary_Tables.pdf]

**SUPPLEMENTARY DATA**

**Table S1** Comparison of repeated subendocardial and subepicardial as determined by the three definitions: twist, normalized twist, CL shear angle.

**Table S2** Inter-study reproducibility for subendocardial and subepicardial as determined by the three definitions: twist, normalized twist, CL shear angle.

**Table S3** Sample size calculations for subendocardial and subepicardial as determined by the three different definitions to detect a relative change in 10, 15 or 20 % of mean (Exam A and B) torsion and torsion rate, respectively.

## Supplementary material

**Table S1** Comparison of repeated subendocardial and subepicardial torsion (mean (standard deviation)) and torsion rates (median (25<sup>th</sup>-,75<sup>th</sup> percentiles)) as determined by the three definitions.

|                                                                   | Exam A              | Exam B               | Exam C               | P value      |
|-------------------------------------------------------------------|---------------------|----------------------|----------------------|--------------|
| <b>Subendocardial</b>                                             |                     |                      |                      |              |
| Twist                                                             | 12.3 (4.1)          | 12.4 (4.6)           | 11.0 (3.9)           | 0.22         |
| Peak Torsion [°]                                                  |                     |                      |                      |              |
| Peak Systolic Torsion Rate [° s <sup>-1</sup> ]                   | 86.6 (52.6;92.6)    | 73.1 (49.6;104.3)    | 71.5 (52.7;79.1)     | 0.59         |
| Peak Diastolic Torsion Rate [° s <sup>-1</sup> ]                  | -65.8 (-88.0;-49.0) | -75.4 (-100.7;-58.0) | -72.9 (-102.0;-61.0) | 0.60         |
| Normalized Twist                                                  | 3.0 (1.1)           | 3.0 (1.1)            | 2.7 (1.0)            | 0.18         |
| Peak Systolic Torsion Rate [° cm <sup>-1</sup> s <sup>-1</sup> ]  | 18.8 (13.3;25.0)    | 18.0 (14.0;25.0)     | 16.0 (12.0;22.8)     | 0.43         |
| Peak Diastolic Torsion Rate [° cm <sup>-1</sup> s <sup>-1</sup> ] | -15.1 (-21.3;-12.3) | -19.3 (-23.6;-13.2)  | -18.3 (-23.3;-12.8)  | 0.65         |
| CL Shear Angle                                                    | 5.5 (1.9)           | 5.4 (1.8)            | 4.8 (1.7)            | 0.16         |
| Peak Torsion [°]                                                  |                     |                      |                      |              |
| Peak Systolic Torsion Rate [° s <sup>-1</sup> ]                   | 36.1 (30.1;42.0)    | 32.8 (29.1;45.0)     | 32.7 (24.2;39.0)     | 0.49         |
| Peak Diastolic Torsion Rate [° s <sup>-1</sup> ]                  | -25.4 (-40.8;-18.1) | -32.9 (-40.5;-21.1)  | -33.0 (-40.8;-22.7)  | 0.52         |
| <b>Subepicardial</b>                                              |                     |                      |                      |              |
| Twist                                                             | 7.1 (3.2)           | 7.1 (2.8)            | 5.9 (3.2)            | 0.39         |
| Peak Torsion [°]                                                  |                     |                      |                      |              |
| Peak Systolic Torsion Rate [° s <sup>-1</sup> ]                   | 49.4 (32.4;56.7)    | 47.3 (37.3;58.8)     | 41.3 (27.5;49.5)     | <b>0.04*</b> |
| Peak Diastolic Torsion Rate [° s <sup>-1</sup> ]                  | -54.3 (-74.4;-44.7) | -51.3 (-78.5;-34.3)  | -46.7 (-69.3;-40.0)  | 0.67         |
| Normalized Twist                                                  | 1.7 (0.7)           | 1.7 (0.6)            | 1.4 (0.8)            | 0.45         |
| Peak Systolic Torsion Rate [° cm <sup>-1</sup> s <sup>-1</sup> ]  | 11.6 (8.8;15.0)     | 11.8 (10.8;13.5)     | 10.1 (6.8;12.4)      | <b>0.03*</b> |
| Peak Diastolic Torsion Rate [° cm <sup>-1</sup> s <sup>-1</sup> ] | -13.4 (-17.0;-10.8) | -13.8 (-18.3;-8.4)   | -12.4 (-16.2;-9.0)   | 0.70         |
| CL Shear Angle                                                    | 4.2 (1.4)           | 4.3 (1.4)            | 3.6 (1.9)            | 0.46         |
| Peak Torsion [°]                                                  |                     |                      |                      |              |
| Peak Systolic Torsion Rate [° s <sup>-1</sup> ]                   | 22.3 (17.7;28.9)    | 21.9 (18.7;24.8)     | 18.9 (15.4;23.7)     | 0.16         |
| Peak Diastolic Torsion Rate [° s <sup>-1</sup> ]                  | -22.5 (-30.9;-16.7) | -21.0 (-31.9;-14.7)  | -22.3 (-30.2;-17.6)  | 0.96         |

\* pairwise comparison between Exam B and C (p = 0.02)

**Table S2** Interstudy reproducibility for subendocardial and subepicardial as determined by the three different definitions.

|                                                  |                                                                   | Mean difference $\pm$ SD | CoV [%]          | ICC (95% CI)     |
|--------------------------------------------------|-------------------------------------------------------------------|--------------------------|------------------|------------------|
| <b>Subendocardial</b>                            | Twist                                                             |                          |                  |                  |
|                                                  | Peak Torsion [°]                                                  | 0.0 $\pm$ 5.8            | 23.3             | 0.87 (0.67-0.96) |
|                                                  | Peak Systolic Torsion Rate [° s <sup>-1</sup> ]                   | 1.5 $\pm$ 47.4           | 30.6             | 0.75 (0.27-0.91) |
|                                                  | Peak Diastolic Torsion Rate [° s <sup>-1</sup> ]                  | 6.5 $\pm$ 69.1           | 46.0             | 0.51 (0.00-0.83) |
|                                                  | Normalized Twist                                                  |                          |                  |                  |
|                                                  | Peak Torsion [° cm <sup>-1</sup> ]                                | 0.0 $\pm$ 1.3            | 22.4             | 0.90 (0.70-0.96) |
|                                                  | Peak Systolic Torsion Rate [° cm <sup>-1</sup> s <sup>-1</sup> ]  | 0.7 $\pm$ 10.9           | 29.1             | 0.80 (0.43-0.92) |
|                                                  | Peak Diastolic Torsion Rate [° cm <sup>-1</sup> s <sup>-1</sup> ] | 1.3 $\pm$ 15.8           | 43.5             | 0.61 (0.00-0.86) |
|                                                  | CL Shear Angle                                                    |                          |                  |                  |
|                                                  | Peak Torsion [°]                                                  | 0.1 $\pm$ 2.3            | 21.5             | 0.90 (0.70-0.96) |
| Peak Systolic Torsion Rate [° s <sup>-1</sup> ]  | 2.4 $\pm$ 23.0                                                    | 31.4                     | 0.80 (0.44-0.93) |                  |
| Peak Diastolic Torsion Rate [° s <sup>-1</sup> ] | 3.1 $\pm$ 30.4                                                    | 48.8                     | 0.47 (0.00-0.82) |                  |
| <b>Subepicardial</b>                             | Twist                                                             |                          |                  |                  |
|                                                  | Peak Torsion [°]                                                  | 0.0 $\pm$ 3.3            | 23.2             | 0.92 (0.77-0.97) |
|                                                  | Peak Systolic Torsion Rate [° s <sup>-1</sup> ]                   | 2.0 $\pm$ 26.6           | 26.5             | 0.87 (0.64-0.96) |
|                                                  | Peak Diastolic Torsion Rate [° s <sup>-1</sup> ]                  | 2.0 $\pm$ 53.1           | 46.1             | 0.42 (0.00-0.80) |
|                                                  | Normalized Twist                                                  |                          |                  |                  |
|                                                  | Peak Torsion [° cm <sup>-1</sup> ]                                | 0.0 $\pm$ 0.9            | 25.1             | 0.89 (0.68-0.96) |
|                                                  | Peak Systolic Torsion Rate [° cm <sup>-1</sup> s <sup>-1</sup> ]  | 0.5 $\pm$ 6.6            | 27.7             | 0.81 (0.47-0.94) |
|                                                  | Peak Diastolic Torsion Rate [° cm <sup>-1</sup> s <sup>-1</sup> ] | 0.6 $\pm$ 12.0           | 43.5             | 0.38 (0.00-0.79) |
|                                                  | CL Shear Angle                                                    |                          |                  |                  |
|                                                  | Peak Torsion [°]                                                  | 0.1 $\pm$ 1.9            | 24.0             | 0.86 (0.58-0.95) |
| Peak Systolic Torsion Rate [° s <sup>-1</sup> ]  | 1.7 $\pm$ 19.6                                                    | 31.1                     | 0.71 (0.16-0.90) |                  |
| Peak Diastolic Torsion Rate [° s <sup>-1</sup> ] | 1.0 $\pm$ 22.9                                                    | 47.8                     | 0.26 (0.00-0.75) |                  |

SD, standard deviation; CoV, coefficient of variation; ICC, intraclass correlation coefficient; CI, confidence interval; CL

Shear Angle, circumferential-longitudinal shear angle

**Table S3** Sample size calculations for subendocardial and subepicardial as determined by the three different definitions to detect a relative change in 10, 15 or 20 % of mean (Exam A and B) torsion and torsion rate, respectively.

|                                                          | Sample size [n] |      |      |
|----------------------------------------------------------|-----------------|------|------|
|                                                          | 10 %            | 15 % | 20 % |
| <b>Subendocardial</b>                                    |                 |      |      |
| Twist                                                    |                 |      |      |
| Peak Torsion                                             | 86              | 38   | 22   |
| Peak Systolic Torsion Rate                               | 148             | 66   | 37   |
| Peak Diastolic Torsion Rate                              | 332             | 148  | 83   |
| Normalized Twist                                         |                 |      |      |
| Peak Torsion                                             | 79              | 35   | 20   |
| Peak Systolic Torsion Rate                               | 133             | 59   | 34   |
| Peak Diastolic Torsion Rate                              | 297             | 132  | 75   |
| CL Shear Angle                                           |                 |      |      |
| Peak Torsion                                             | 73              | 33   | 19   |
| Peak Systolic Torsion Rate                               | 155             | 69   | 39   |
| Peak Diastolic Torsion Rate                              | 375             | 167  | 94   |
| <b>Subepicardial</b>                                     |                 |      |      |
| Twist                                                    |                 |      |      |
| Peak Torsion                                             | 85              | 38   | 22   |
| Peak Systolic Torsion Rate                               | 110             | 49   | 28   |
| Peak Diastolic Torsion Rate                              | 334             | 149  | 84   |
| Normalized Twist                                         |                 |      |      |
| Peak Torsion                                             | 100             | 45   | 25   |
| Peak Systolic Torsion Rate                               | 121             | 54   | 31   |
| Peak Diastolic Torsion Rate                              | 298             | 133  | 75   |
| CL Shear Angle                                           |                 |      |      |
| Peak Torsion                                             | 94              | 42   | 24   |
| Peak Systolic Torsion Rate                               | 158             | 70   | 40   |
| Peak Diastolic Torsion Rate                              | 359             | 160  | 90   |
| CL Shear Angle, circumferential-longitudinal shear angle |                 |      |      |
